# Supplementary material
Source: PubMed Central journal article supplement (PMC4448970)
Supplement: NIHMS685269-supplement.pdf [file NIHMS685269-supplement.pdf]

Supplemental Table 1: DEPRESSION VARIABILITY OUTCOME

| Model         | Sex         | Age          | Poor sleep    | Stressful Events | Baseline Mania | Baseline Depression | Neuroticism  | Adj R <sup>2</sup> |
|---------------|-------------|--------------|---------------|------------------|----------------|---------------------|--------------|--------------------|
| <b>ALL</b>    |             |              |               |                  |                |                     |              |                    |
| <b>1</b>      | <b>0.07</b> |              |               |                  |                |                     |              | <b>0.000</b>       |
| <b>2</b>      | <b>0.08</b> | <b>0.08</b>  |               |                  |                |                     |              | <b>0.002</b>       |
| <b>3</b>      | <b>0.06</b> | <b>0.08</b>  | <b>0.23**</b> |                  |                |                     |              | <b>0.050</b>       |
| <b>4</b>      | <b>0.06</b> | <b>0.08</b>  | <b>0.23**</b> | <b>0.01</b>      |                |                     |              | <b>0.046</b>       |
| <b>5</b>      | <b>0.06</b> | <b>0.08</b>  | <b>0.21**</b> | <b>&lt;-0.01</b> | <b>0.11</b>    |                     |              | <b>0.053</b>       |
| <b>6</b>      | <b>0.05</b> | <b>0.07</b>  | <b>0.16*</b>  | <b>&lt;0.01</b>  | <b>0.10</b>    | <b>0.11</b>         |              | <b>0.057</b>       |
| <b>7</b>      | <b>0.06</b> | <b>0.09</b>  | <b>0.10</b>   | <b>&lt;0.01</b>  | <b>0.10</b>    | <b>0.06</b>         | <b>0.18*</b> | <b>0.079</b>       |
| <b>Male</b>   |             |              |               |                  |                |                     |              |                    |
| <b>1</b>      |             | <b>-0.11</b> |               |                  |                |                     |              | <b>-0.004</b>      |
| <b>2</b>      |             | <b>-0.11</b> | <b>0.22**</b> |                  |                |                     |              | <b>0.008</b>       |
| <b>3</b>      |             | <b>-0.13</b> | <b>0.37**</b> | <b>-0.11</b>     |                |                     |              | <b>0.085</b>       |
| <b>4</b>      |             | <b>-0.13</b> | <b>0.36**</b> | <b>-0.12</b>     | <b>0.06</b>    |                     |              | <b>0.072</b>       |
| <b>5</b>      |             | <b>-0.08</b> | <b>0.16</b>   | <b>-0.12</b>     | <b>0.10</b>    | <b>0.33*</b>        |              | <b>0.136</b>       |
| <b>6</b>      |             | <b>-0.8</b>  | <b>0.16</b>   | <b>-0.11</b>     | <b>0.10</b>    | <b>0.33*</b>        | <b>0.01</b>  | <b>0.121</b>       |
| <b>Female</b> |             |              |               |                  |                |                     |              |                    |
| <b>1</b>      |             | <b>0.15</b>  |               |                  |                |                     |              | <b>0.017</b>       |
| <b>2</b>      |             | <b>0.15</b>  | <b>0.19*</b>  |                  |                |                     |              | <b>0.047</b>       |
| <b>3</b>      |             | <b>0.16</b>  | <b>0.18*</b>  | <b>0.05</b>      |                |                     |              | <b>0.044</b>       |
| <b>4</b>      |             | <b>0.16*</b> | <b>0.17*</b>  | <b>0.03</b>      | <b>0.13</b>    |                     |              | <b>0.054</b>       |
| <b>5</b>      |             | <b>0.16</b>  | <b>0.16</b>   | <b>0.03</b>      | <b>0.13</b>    | <b>0.03</b>         |              | <b>0.047</b>       |
| <b>6</b>      |             | <b>0.18*</b> | <b>0.11</b>   | <b>0.02</b>      | <b>0.14</b>    | <b>-0.05</b>        | <b>0.21</b>  | <b>0.077</b>       |

\*p&lt;0.05

\*\*p&lt;0.01

\*\*\*p&lt;0.001

**Supplemental Table 2: MANIA VARIABILITY**

| Model         | Sex          | Age         | Poor sleep   | Stressful Events | Baseline Mania | Baseline Depression | Neuroticism  | Adj R <sup>2</sup> |
|---------------|--------------|-------------|--------------|------------------|----------------|---------------------|--------------|--------------------|
| <b>ALL</b>    |              |             |              |                  |                |                     |              |                    |
| <b>1</b>      | <b>0.14*</b> |             |              |                  |                |                     |              | <b>0.014</b>       |
| <b>2</b>      | <b>0.14*</b> | <b>0.09</b> |              |                  |                |                     |              | <b>0.018</b>       |
| <b>3</b>      | <b>0.13*</b> | <b>0.09</b> | <b>0.18*</b> |                  |                |                     |              | <b>0.047</b>       |
| <b>4</b>      | <b>0.13*</b> | <b>0.09</b> | <b>0.17*</b> | <b>0.05</b>      |                |                     |              | <b>0.044</b>       |
| <b>5</b>      | <b>0.13*</b> | <b>0.09</b> | <b>0.14*</b> | <b>0.02</b>      | <b>0.21*</b>   |                     |              | <b>0.082</b>       |
| <b>6</b>      | <b>0.14*</b> | <b>0.10</b> | <b>0.22*</b> | <b>0.10</b>      | <b>0.23*</b>   | <b>-0.15</b>        |              | <b>0.094</b>       |
| <b>7</b>      | <b>0.15*</b> | <b>0.12</b> | <b>0.18*</b> | <b>0.01</b>      | <b>0.23*</b>   | <b>-0.19*</b>       | <b>0.15*</b> | <b>0.107</b>       |
| <b>Male</b>   |              |             |              |                  |                |                     |              |                    |
| <b>1</b>      |              | <b>0.06</b> |              |                  |                |                     |              | <b>-0.013</b>      |
| <b>2</b>      |              | <b>0.06</b> | <b>0.21</b>  |                  |                |                     |              | <b>0.018</b>       |
| <b>3</b>      |              | <b>0.06</b> | <b>0.21</b>  | <b>0.02</b>      |                |                     |              | <b>0.002</b>       |
| <b>4</b>      |              | <b>0.06</b> | <b>0.20</b>  | <b>0.02</b>      | <b>0.09</b>    |                     |              | <b>-0.008</b>      |
| <b>5</b>      |              | <b>0.03</b> | <b>0.28</b>  | <b>0.01</b>      | <b>0.07</b>    | <b>-0.16</b>        |              | <b>-0.007</b>      |
| <b>6</b>      |              | <b>0.08</b> | <b>0.15</b>  | <b>0.07</b>      | <b>0.04</b>    | <b>-0.32</b>        | <b>0.40*</b> | <b>0.073</b>       |
| <b>Female</b> |              |             |              |                  |                |                     |              |                    |
| <b>1</b>      |              | <b>0.10</b> |              |                  |                |                     |              | <b>0.004</b>       |
| <b>2</b>      |              | <b>0.10</b> | <b>0.18*</b> |                  |                |                     |              | <b>0.028</b>       |
| <b>3</b>      |              | <b>0.11</b> | <b>0.16*</b> | <b>0.06</b>      |                |                     |              | <b>0.024</b>       |
| <b>4</b>      |              | <b>0.11</b> | <b>0.13</b>  | <b>0.01</b>      | <b>0.25**</b>  |                     |              | <b>0.080</b>       |
| <b>5</b>      |              | <b>0.13</b> | <b>0.22*</b> | <b>-0.003</b>    | <b>0.29***</b> | <b>-0.19*</b>       |              | <b>0.099</b>       |
| <b>6</b>      |              | <b>0.14</b> | <b>0.20*</b> | <b>-0.01</b>     | <b>0.30***</b> | <b>-0.21*</b>       | <b>0.10</b>  | <b>0.101</b>       |

**Supplemental Table 3: MANIA FREQUENCY**

| Model         | Sex   | Age   | Poor sleep | Stressful Events | Baseline Mania | Baseline Depression | Neuroticism | Adj R <sup>2</sup> |
|---------------|-------|-------|------------|------------------|----------------|---------------------|-------------|--------------------|
| <b>ALL</b>    |       |       |            |                  |                |                     |             |                    |
| 1             | -0.04 |       |            |                  |                |                     |             | 0.001              |
| 2             | -0.03 | 0.15* |            |                  |                |                     |             | 0.022              |
| 3             | -0.04 | 0.14* | 0.13*      |                  |                |                     |             | 0.040              |
| 4             | -0.04 | 0.16* | 0.10       | 0.16*            |                |                     |             | 0.064              |
| 5             | -0.04 | 0.16* | 0.07       | 0.13             | 0.20**         |                     |             | 0.103              |
| 6             | -0.02 | 0.17* | 0.15       | 0.12             | 0.22**         | -0.16*              |             | 0.121              |
| 7             | -0.02 | 0.18* | 0.12       | 0.12             | 0.22**         | -0.18*              | 0.08        | 0.126              |
| <b>Male</b>   |       |       |            |                  |                |                     |             |                    |
| 1             |       | 0.11  |            |                  |                |                     |             | -0.005             |
| 2             |       | 0.11  | 0.06       |                  |                |                     |             | -0.018             |
| 3             |       | 0.13  | 0.01       | 0.15             |                |                     |             | -0.014             |
| 4             |       | 0.12  | -0.02      | 0.14             | 0.17           |                     |             | -0.003             |
| 5             |       | 0.09  | 0.11       | 0.14             | 0.14           | -0.23               |             | 0.016              |
| 6             |       | 0.12  | 0.02       | 0.18             | 0.12           | -0.34               | 0.26        | 0.042              |
| <b>Female</b> |       |       |            |                  |                |                     |             |                    |
| 1             |       | 0.16* |            |                  |                |                     |             | 0.020              |
| 2             |       | 0.16* | 0.17*      |                  |                |                     |             | 0.041              |
| 3             |       | 0.18* | 0.13       | 0.17*            |                |                     |             | 0.063              |
| 4             |       | 0.18* | 0.11       | 0.13             | 0.22**         |                     |             | 0.105              |
| 5             |       | 0.20* | 0.18*      | 0.12             | 0.26**         | -0.15               |             | 0.116              |
| 6             |       | 0.20* | 0.17       | 0.12             | 0.26**         | -0.16               | 0.04        | 0.112              |

**Supplemental Table 4: MIXED FREQUENCY**

| Model         | Sex         | Age         | Poor sleep     | Stressful Events | Baseline Mania | Baseline Depression | Neuroticism | Adj R <sup>2</sup> |
|---------------|-------------|-------------|----------------|------------------|----------------|---------------------|-------------|--------------------|
| <b>ALL</b>    |             |             |                |                  |                |                     |             |                    |
| <b>1</b>      | <b>0.04</b> |             |                |                  |                |                     |             | <b>-0.003</b>      |
| <b>2</b>      | <b>0.04</b> | <b>0.10</b> |                |                  |                |                     |             | <b>0.001</b>       |
| <b>3</b>      | <b>0.03</b> | <b>0.10</b> | <b>0.28***</b> |                  |                |                     |             | <b>0.075</b>       |
| <b>4</b>      | <b>0.03</b> | <b>0.10</b> | <b>0.27***</b> | <b>0.05</b>      |                |                     |             | <b>0.074</b>       |
| <b>5</b>      | <b>0.02</b> | <b>0.10</b> | <b>0.24**</b>  | <b>0.02</b>      | <b>0.23**</b>  |                     |             | <b>0.120</b>       |
| <b>6</b>      | <b>0.03</b> | <b>0.10</b> | <b>0.26**</b>  | <b>0.02</b>      | <b>0.24***</b> | <b>-0.06</b>        |             | <b>0.118</b>       |
| <b>7</b>      | <b>0.03</b> | <b>0.11</b> | <b>0.24**</b>  | <b>0.02</b>      | <b>0.24***</b> | <b>-0.08</b>        | <b>0.09</b> | <b>0.120</b>       |
| <b>Male</b>   |             |             |                |                  |                |                     |             |                    |
| <b>1</b>      |             | <b>0.23</b> |                |                  |                |                     |             | <b>0.037</b>       |
| <b>2</b>      |             | <b>0.23</b> | <b>0.20</b>    |                  |                |                     |             | <b>0.062</b>       |
| <b>3</b>      |             | <b>0.23</b> | <b>0.18</b>    | <b>0.05</b>      |                |                     |             | <b>0.049</b>       |
| <b>4</b>      |             | <b>0.23</b> | <b>0.15</b>    | <b>0.04</b>      | <b>0.17</b>    |                     |             | <b>0.063</b>       |
| <b>5</b>      |             | <b>0.22</b> | <b>0.21</b>    | <b>0.04</b>      | <b>0.16</b>    | <b>-0.10</b>        |             | <b>0.054</b>       |
| <b>6</b>      |             | <b>0.25</b> | <b>0.11</b>    | <b>0.08</b>      | <b>0.14</b>    | <b>-0.22</b>        | <b>0.28</b> | <b>0.085</b>       |
| <b>Female</b> |             |             |                |                  |                |                     |             |                    |
| <b>1</b>      |             | <b>0.04</b> |                |                  |                |                     |             | <b>-0.005</b>      |
| <b>2</b>      |             | <b>0.04</b> | <b>0.31***</b> |                  |                |                     |             | <b>0.088</b>       |
| <b>3</b>      |             | <b>0.05</b> | <b>0.30***</b> | <b>0.06</b>      |                |                     |             | <b>0.086</b>       |
| <b>4</b>      |             | <b>0.05</b> | <b>0.27**</b>  | <b>0.02</b>      | <b>0.26**</b>  |                     |             | <b>0.143</b>       |
| <b>5</b>      |             | <b>0.05</b> | <b>0.29**</b>  | <b>0.02</b>      | <b>0.26**</b>  | <b>-0.03</b>        |             | <b>0.138</b>       |
| <b>6</b>      |             | <b>0.05</b> | <b>0.27**</b>  | <b>0.02</b>      | <b>0.26**</b>  | <b>-0.04</b>        | <b>0.04</b> | <b>0.134</b>       |
